# Supplementary material for: Comorbid Depression and Heart Failure: A Community Cohort Study
Source: PLoS One. 2016 Jun 30;11(6):e0158570. doi: 10.1371/journal.pone.0158570 (PMC4928788; doi:10.1371/journal.pone.0158570)
Supplement: S2 File — (XLSX) [file pone.0158570.s002.xlsx]

## Sheet: hf
id	Age (years)	Male (1=Yes, 0=No)	PHQ-9	Systolic BP (mm Hg)	Estimated glomerular filtration rate	Ejection fraction (%)	Serum sodium (mmol/l)	Blood urea nitrogen (mg/dl)	Etiology HF(1=Yes, 0=No)	Prior diabetes mellitus	Elevated level of BNP/NT-BNP (1=Yes, 0=No)	Time from HF to Death (days)	Death (1=Yes, 0=No)	Time from HF to hospitalization (days)	Hospitalized (1=Yes, 0=No)
11	93	0	1	145	46.3525	60.5	137	26	1	1	1	679	1	134	1
12	99	1	8	115	32.8279	65	140	75	1	0	1	74	1	74	0
13	83	1	4	121	57.8216	65	141	28	0	0	1	730	0	224	1
15	86	1	4	113	63.4699	32.5	141	47	0	1	1	730	0	5	1
16	84	1	3	142	57.6812	58	137	32	0	1	1	730	0	730	0
18	85	0	3	96	25.124	54	145	44	1	0	1	40	1	8	1
19	85	1	2	103	44.4792	31	141	49	1	0	1	57	1	11	1
20	85	0	0	69	47.2066	17.75	142	25	0	0	1	730	0	35	1
22	87	1	3	101	28.4551	29.3333	143	40	0	0	1	730	0	148	1
23	80	1	0	117	64.4086	58.5	137	24	0	1	0	730	0	132	1
24	96	1	4	118	25.2274	55	141	74	1	0	1	213	1	85	1
25	79	1	2	109	22.91	20.6667	142	43	1	1	1	372	1	372	0
27	94	0	0	134	38.1423	59	142	33	0	1	1	730	0	512	1
28	81	1	0	108	71.7159	11.5	138	35	0	0	0	730	0	730	0
29	76	1	7	126	65.0827	82	142	28	0	0	0	314	1	73	1
30	80	1	4	108	38.9738	25	141	37	1	1	0	650	1	162	1
32	84	0	6	131	59.651	70.5	138	28	0	0	0	730	0	665	1
36	92	0	4	98	58.5595	62.3333	138	24	0	0	0	556	1	137	1
38	75	0	14	132	48.4214	52	143	30	1	0	1	730	0	194	1
39	86	1	0	180	28.5219	36.6	138	51	1	0	1	730	0	34	1
40	75	0	7	126	81.5758	35	138	26	0	1	0	730	0	89	1
42	81	1	0	92	41.6928	31	136	48	1	1	1	393	1	15	1
43	90	0	1	149	58.8213	65	137	42	0	0	1	730	0	409	1
44	76	1	4	82	65.0827	26.17	139	25	0	0	0	730	0	730	0
45	83	1	0	158	71.3617	56	138	30	0	1	1	730	0	730	0
46	76	1	0	118	72.6495	40	141	26	1	1	1	730	0	730	0
48	96	0	0	155	51.4092	31	144	31	1	0	0	386	1	320	1
49	78	0	2	139	60.5551	62	141	21	1	0	1	730	0	730	0
50	79	1	11	113	58.4043	65	143	55	1	1	0	730	0	1	1
51	71	0	3	128	82.4885	35	142	23	1	1	1	730	0	80	1
52	70	0	3	162	70.9122	66	142	24	1	0	1	730	0	730	0
53	71	0	7	149	82.4885	65	144	9	1	0	1	730	0	472	1
54	72	1	0	119	49.8159	40.67	139	34	1	1	1	730	0	289	1
55	85	0	7	116	22.3835	28.5	141	50	0	0	1	730	0	730	0
56	88	0	1	109	67.6934	32	138	15	1	0	1	730	0	730	0
58	72	0	7	123	82.2546	61	140	17	0	1	1	730	0	115	1
59	80	1	0	148	71.897	39.5	144	23	0	1	1	730	0	661	1
61	83	0	2	98	68.502	42	143	22	1	0	1	730	0	522	1
62	70	1	0	122	73.8726	12	140	17	0	0	0	730	0	730	0
63	88	0	9	115	32.772	57	140	40	0	0	1	151	1	151	0
64	89	0	0	136	78.7903	35	140	30	0	0	1	730	0	139	1
65	94	0	0	136	58.3044	63.5	138	25	0	0	0	730	0	71	1
66	85	0	2	143	47.2066	70	138	25	1	1	1	730	0	162	1
67	68	1	6	78	31.5644	21	131	119	0	1	1	138	1	138	0
68	89	0	12	118	67.5383	31.1667	146	19	1	0	1	730	0	186	1
69	84	1	0	142	71.1884	65	141	24	1	1	0	730	0	346	1
71	87	0	2	150	59.2275	70.5	139	18	1	0	0	730	0	222	1
72	66	0	20	155	71.7643	43	140	43	1	1	0	730	0	730	0
76	92	1	0	105	62.6069	29	140	28	0	0	1	156	1	85	1
78	65	0	1	122	41.1083	57	136	28	0	0	1	730	0	6	1
80	90	1	0	123	51.8604	50	140	41	1	0	1	484	1	48	1
81	85	0	5	113	68.1717	21.33	141	23	0	0	1	655	1	620	1
82	82	1	1	109	71.5375	33	141	19	0	0	1	730	0	730	0
83	65	1	0	128	74.9923	55	137	34	0	0	0	730	0	48	1
84	85	0	2	134	47.2066	60	130	21	0	0	0	730	0	10	1
85	85	0	5	144	38.9295	60	141	29	0	1	1	679	1	288	1
86	73	0	0	163	61.375	44.5	139	22	1	1	1	730	0	730	0
87	84	0	4	154	95.2416	58.3333	141	17	1	0	0	730	0	263	1
89	85	0	1	143	47.2066	50	137	17	1	1	1	730	0	730	0
90	86	0	2	128	42.5955	66.2	141	23	1	0	1	730	0	730	0
91	87	1	13	143	41.0924	61	140	29	1	0	1	494	1	42	1
93	84	0	5	166	59.651	54.67	140	14	1	1	1	730	0	730	0
95	89	0	2	138	46.768	55	140	40	1	0	1	361	1	260	1
96	89	0	3	91	46.768	47.5	144	27	0	0	0	730	0	730	0
98	91	1	7	104	51.7442	32	139	27	0	0	1	730	0	20	1
99	84	0	2	140	33.0829	42.5	147	22	1	0	1	730	0	103	1
100	77	0	0	124	43.5621	79	139	28	0	0	1	730	0	730	0
102	89	0	0	107	46.768	32	139	23	0	0	0	730	0	7	1
103	87	1	0	107	79.8215	34.2857	137	21	1	0	0	730	0	730	0
104	74	0	12	131	70.1168	59.75	145	21	0	0	1	5	1	3	1
105	65	0	10	99	41.1083	64.5	139	32	0	0	0	730	0	238	1
106	79	1	7	180	72.0808	41.3333	144	37	0	1	0	730	0	730	0
108	63	0	0	107	100.969	57	142	5	0	0	0	730	0	730	0
110	79	1	1	160	72.0808	65.125	132	20	1	0	0	730	0	14	1
112	81	0	1	105	16.2181	13.3333	140	43	0	0	1	730	0	730	0
113	88	1	4	113	52.0976	50.8	138	21	1	0	1	730	0	365	1
115	64	1	1	91	84.9547	48	142	19	1	1	0	730	0	115	1
116	86	0	21	100	94.7878	31.33	137	23	0	0	1	290	1	60	1
117	70	1	0	120	73.8726	26	144	18	0	0	1	730	0	730	0
119	83	0	1	128	59.7962	64.5	138	10	1	0	1	730	0	730	0
120	88	1	7	139	31.6898	15	134	43	0	0	1	730	0	5	1
121	61	1	8	171	98.2766	42	136	19	1	0	0	730	0	629	1
122	89	0	2	84	94.1303	60	137	12	0	0	1	615	1	216	1
123	63	1	10	132	67.609	33	139	48	0	1	0	730	0	135	1
126	87	1	2	130	44.2697	28	142	55	0	0	1	730	0	314	1
127	81	0	0	135	47.6708	62.5	136	16	1	0	0	730	0	321	1
128	92	0	0	118	46.4543	42.33	135	20	0	0	1	730	0	548	1
129	82	0	7	113	33.2452	45	143	40	0	0	1	730	0	730	0
131	79	0	15	100	80.7199	52.3333	139	17	1	1	1	230	1	77	1
132	90	1	1	84	56.879	26.2	137	21	1	0	1	407	1	406	1
134	77	0	5	168	48.1634	38	131	19	0	0	1	730	0	117	1
136	74	1	1	162	53.9627	21.4286	145	25	0	1	0	730	0	730	0
138	78	1	0	104	81.6107	37	138	15	1	0	1	730	0	198	1
140	86	0	0	145	52.5701	63.5	143	41	0	0	1	730	0	472	1
141	85	1	9	76	57.5428	29	142	19	0	0	1	15	1	10	1
142	92	1	8	130	35.4654	25	140	28	1	0	1	345	1	86	1
143	87	1	4	120	47.9384	38.6667	139	32	1	1	1	72	1	36	1
145	60	1	4	148	76.2208	20.8	139	23	1	1	1	335	1	7	1
146	78	0	1	133	80.9289	62.86	139	20	0	1	0	578	1	114	1
148	61	0	1	110	85.0701	46	136	17	1	1	1	730	0	5	1
150	71	1	1	87	65.9881	30	136	30	1	1	1	730	0	49	1
151	82	1	7	132	48.5179	35	139	54	0	1	1	123	1	111	1
152	85	0	7	150	35.7387	51.5	141	39	1	0	1	567	1	60	1
153	79	0	9	136	47.9133	67.25	140	10	1	1	0	730	0	730	0
155	96	1	5	91	37.5577	40	141	37	1	0	1	43	1	31	1
156	81	1	1	168	108.236	62	135	26	0	1	1	730	0	649	1
157	80	0	14	104	80.514	25.4	140	16	1	1	1	730	0	28	1
158	79	0	14	147	36.2737	64	144	41	0	0	1	329	1	295	1
159	78	0	5	126	36.3676	63	132	27	1	1	0	359	1	40	1
161	77	1	7	103	39.2774	46	148	29	0	1	1	730	0	620	1
162	58	1	4	117	76.7471	57	139	17	0	0	0	730	0	2	1
163	61	0	15	116	101.633	37.5	140	19	1	0	1	730	0	10	1
165	82	1	0	106	80.7863	31	137	20	0	1	0	273	1	32	1
168	59	0	9	156	85.6477	54.5	143	21	0	1	0	730	0	19	1
169	78	1	1	112	45.262	55	140	42	1	1	1	730	0	147	1
171	58	0	0	170	46.1414	43	143	41	1	0	0	414	1	414	0
172	76	1	3	117	65.0827	29.6667	141	29	0	0	1	730	0	730	0
173	82	1	8	112	44.8048	24.3333	143	23	1	0	1	730	0	692	1
174	79	1	0	131	41.9049	59.5	136	29	0	0	1	730	0	730	0
177	80	1	0	132	64.4086	24.8333	142	29	1	0	1	284	1	67	1
178	76	0	4	132	43.6779	63	140	26	0	1	1	730	0	730	0
179	76	0	2	157	81.3568	44	140	14	0	0	1	591	1	349	1
180	83	0	2	129	35.9118	33.8	144	58	1	0	1	730	0	95	1
182	92	0	0	115	24.7236	57	142	58	1	0	1	157	1	2	1
183	62	0	12	92	38.1026	50.6667	139	42	0	0	1	661	1	661	0
184	79	0	7	122	60.3987	40	136	27	0	0	0	730	0	110	1
185	76	0	17	109	31.3388	24	141	31	0	0	1	516	1	108	1
187	81	1	1	120	52.9816	41.5	139	49	1	1	1	730	0	730	0
188	84	1	3	165	22.6264	68.5	132	74	1	1	1	730	0	17	1
189	58	0	2	123	85.9455	57	139	19	0	0	0	730	0	730	0
191	57	1	3	117	32.7156	62	142	45	0	0	1	730	0	300	1
192	90	0	1	162	52.0872	76.5	139	13	0	0	1	730	0	674	1
194	72	1	3	125	54.2636	63.5	140	28	1	1	0	730	0	324	1
195	82	1	6	143	71.5375	53	138	26	0	0	1	730	0	730	0
198	58	0	2	92	46.1414	21	140	23	0	0	1	730	0	11	1
199	62	1	2	90	55.9361	15.75	131	32	0	0	1	730	0	32	1
200	85	1	3	148	52.4657	50	137	40	0	0	1	730	0	18	1
201	75	0	14	149	33.8528	65	133	52	0	1	1	27	1	4	1
203	82	1	1	156	10.6725	33.2	143	73	0	0	1	730	0	67	1
204	60	1	0	137	68.282	20	143	18	0	0	0	730	0	730	0
205	78	1	4	143	64.7404	69.5	136	36	1	1	0	730	0	207	1
206	72	0	5	131	25.9849	66.5	141	35	0	1	1	272	1	27	1
207	57	0	11	135	29.0011	63	134	54	1	1	1	103	1	77	1
210	73	1	7	110	59.3483	67.6667	133	25	0	0	1	95	1	7	1
211	91	1	2	120	43.8675	50.6	133	51	1	0	1	617	1	190	1
212	53	0	10	149	129.063	62	134	11	0	0	0	730	0	27	1
213	84	1	1	85	63.7738	68.5	133	18	0	0	1	65	1	65	0
214	54	0	13	135	87.2013	35.5	128	7	0	0	1	730	0	194	1
216	78	1	0	115	53.3891	20	138	39	0	1	1	730	0	191	1
217	86	1	10	120	48.0511	35	143	31	1	0	1	274	1	19	1
219	71	1	5	128	26.8206	36	143	40	1	0	1	411	1	411	0
220	79	0	4	104	33.4977	39.1667	140	32	1	0	0	730	0	434	1
221	84	1	24	166	57.6812	25.8	132	22	1	0	1	289	1	261	1
222	78	1	13	122	64.7404	25.6667	141	20	1	0	1	730	0	730	0
224	86	1	6	76	91.6577	29.8	139	16	0	0	1	730	0	730	0
225	82	1	11	107	6.76995	35.6667	139	26	0	1	1	100	1	10	1
228	77	0	3	138	39.7186	62	143	20	0	0	1	730	0	730	0
229	64	1	8	128	43.735	48.2	142	52	0	1	0	524	1	4	1
231	89	1	4	157	38.1394	52.6667	135	33	1	0	1	730	0	639	1
232	51	0	2	96	66.0099	37	138	15	0	0	0	730	0	730	0
233	72	0	0	139	21.9406	69.5	145	14	1	0	1	730	0	524	1
236	53	1	1	148	45.4418	49.33	136	36	1	1	0	730	0	296	1
238	85	1	3	137	71.0176	60	137	22	1	0	1	730	0	481	1
239	73	0	5	104	61.375	35	139	8	1	0	1	730	0	730	0
240	73	0	1	156	70.3107	62	137	17	0	1	1	730	0	20	1
241	80	0	7	142	69.0159	45	140	14	1	1	1	730	0	94	1
243	84	0	0	146	47.3201	60	141	25	0	0	0	194	1	130	1
244	89	1	4	149	57.0081	35	144	41	1	0	1	730	0	50	1
247	82	1	0	131	71.5375	57.5	138	24	0	0	1	730	0	730	0
248	65	1	0	115	50.861	50.5	140	16	0	0	0	730	0	730	0
252	84	0	2	154	47.3201	67	137	33	1	1	1	730	0	730	0
253	86	1	0	140	19.2001	44	136	52	0	0	1	730	0	212	1
254	75	1	0	153	49.4048	61	135	40	0	1	1	217	1	3	1
255	50	1	2	124	58.4328	25	144	26	0	0	0	408	1	368	1
257	76	0	1	134	81.3568	70.5	139	17	0	1	0	730	0	730	0
258	75	1	1	122	82.263	27	142	22	0	1	1	730	0	730	0
259	77	0	18	99	69.5534	35	140	22	1	0	1	74	1	6	1
260	76	0	8	97	43.6779	44.5	136	23	0	0	1	730	0	730	0
261	75	1	7	127	94.2399	62	139	11	1	1	1	730	0	730	0
262	68	0	0	138	20.0761	60	142	53	1	0	1	342	1	326	1
264	66	1	1	116	60.5753	18	140	19	0	0	0	730	0	7	1
265	73	1	6	122	45.8748	30	136	27	0	1	1	730	0	3	1
266	90	0	0	119	46.662	70.8	130	23	1	0	0	730	0	35	1
268	76	1	0	94	49.2721	60	135	32	0	0	1	730	0	371	1
269	69	0	1	102	49.248	73	137	35	0	1	1	580	1	229	1
270	76	0	8	138	69.7382	67.5	140	17	0	0	0	730	0	614	1
271	73	0	0	102	61.375	60	140	17	0	0	1	730	0	59	1
273	93	1	5	122	62.4696	45.33	138	34	0	1	1	541	1	7	1
274	91	1	5	111	40.7191	34.67	140	28	1	1	1	412	1	412	0
277	68	1	6	97	29.9146	64.5	141	36	0	0	1	232	1	91	1
278	73	1	6	132	73.2459	44.6	143	14	0	0	1	730	0	343	1
279	75	1	4	127	45.6238	50	139	63	1	0	1	730	0	443	1
282	79	1	1	112	58.4043	30.4	140	23	1	1	1	730	0	730	0
283	50	1	3	87	70.8565	35	142	29	0	1	1	730	0	422	1
284	71	0	1	128	54.6558	19.67	145	25	1	0	1	730	0	39	1
288	67	1	10	106	84.1684	32.5	136	12	1	0	1	730	0	105	1
289	76	0	6	118	69.7382	41	140	18	0	0	1	730	0	4	1
294	79	1	5	151	11.7942	61	137	14	1	1	1	730	0	15	1
296	69	0	4	123	44.5431	64	137	37	1	1	1	730	0	270	1
298	48	1	5	123	40.4726	18.67	142	28	1	0	1	730	0	589	1
300	71	1	5	138	24.4542	60	144	30	0	1	1	730	0	71	1
303	76	0	6	109	24.2241	46.5	142	38	1	1	0	512	1	306	1
305	67	0	1	118	37.5074	42.8	140	26	0	0	1	730	0	109	1
307	82	0	0	115	59.9435	53	140	9	0	0	1	730	0	665	1
309	81	0	9	95	53.2132	54.5	135	21	0	0	1	730	0	59	1
310	48	1	0	95	90.0638	53.33	140	29	0	0	1	730	0	730	0
312	68	1	0	124	54.8969	55	135	21	0	0	1	730	0	215	1
313	84	0	1	144	95.2416	53.33	138	19	0	1	0	730	0	196	1
315	83	1	6	122	71.3617	51	145	11	1	0	0	730	0	730	0
316	74	1	10	134	34.8259	31	131	49	0	1	0	371	1	247	1
317	81	1	2	102	34.1927	49	139	20	1	0	1	730	0	498	1
318	81	1	6	132	58.1086	26.4	139	27	1	0	0	730	0	423	1
319	78	0	3	142	60.5551	25.67	141	30	0	0	1	730	0	730	0
321	51	0	4	98	43.1832	46	136	30	1	0	1	226	1	41	1
322	75	0	8	108	69.926	51.5	139	23	0	0	1	730	0	730	0
323	76	0	2	103	69.7382	62.2	135	19	0	0	1	730	0	454	1
324	66	1	7	164	74.7602	64.5	142	20	0	0	0	730	0	730	0
325	62	0	2	122	50.3291	54.5	140	14	0	0	1	730	0	22	1
326	72	1	2	120	82.9476	55.6667	141	13	0	0	1	730	0	163	1
329	68	1	4	171	37.7098	68	141	33	1	1	1	730	0	32	1
332	84	1	15	106	48.2811	60	138	35	1	0	1	730	0	730	0
333	76	1	6	120	49.2721	29.5	140	24	0	1	1	730	0	706	1
334	62	0	3	109	72.681	55.5	139	10	0	0	1	730	0	219	1
336	48	1	25	109	43.2323	25	139	17	1	1	1	730	0	153	1
337	83	0	2	102	68.502	50	140	19	0	0	1	730	0	730	0
338	74	1	12	96	32.8243	54.5	140	35	0	1	1	348	1	106	1
340	54	1	0	100	77.8686	14.2	139	14	0	0	1	730	0	173	1
342	78	1	0	170	72.2675	30.33	144	20	1	0	1	730	0	433	1
343	66	1	1	157	96.7174	49	138	20	1	1	1	730	0	105	1
344	44	1	3	95	50.8403	53.5	142	34	0	1	1	730	0	22	1
345	84	0	2	98	52.8218	56	141	24	0	0	0	730	0	159	1
346	68	1	0	108	66.5689	19	139	20	0	0	1	730	0	730	0
348	74	0	0	196	54.1986	50	138	38	1	1	1	730	0	29	1
349	63	1	2	119	55.7547	14.83	135	33	0	0	1	730	0	730	0
351	89	0	4	122	46.768	71.5	141	36	0	1	1	700	1	216	1
352	82	1	8	101	71.5375	51.5	136	20	0	0	0	730	0	730	0
354	64	1	3	157	43.735	63	140	0	0	1	0	730	0	730	0
355	80	0	11	132	53.3476	65	140	30	1	0	1	730	0	157	1
356	59	0	1	140	45.9816	57	136	21	0	0	1	730	0	730	0
357	72	1	12	88	23.3456	33	142	58	1	0	1	557	1	478	1
358	83	1	6	116	57.8216	63	137	21	0	0	1	730	0	19	1
359	74	1	0	129	53.9627	26.5	139	19	1	0	1	730	0	730	0
361	57	1	8	107	77.0186	15.33	135	27	0	0	0	730	0	730	0
363	92	1	6	107	69.8858	24.3333	144	23	1	0	1	467	1	467	0
364	98	0	3	108	51.1945	37	141	38	0	1	0	544	1	138	1
365	65	0	8	97	62.8383	36.5	140	15	0	0	1	730	0	730	0
367	80	1	5	154	16.396	57	144	51	1	0	1	89	1	81	1
368	40	1	7	127	44.8623	25.33	139	42	0	0	1	730	0	26	1
369	73	0	12	152	36.86	66.3333	142	24	0	1	1	730	0	149	1
370	67	0	15	102	99.7154	41	141	17	0	1	1	730	0	730	0
371	60	1	5	133	61.7587	26	140	13	1	0	0	730	0	128	1
374	84	1	6	90	57.6812	58.5	138	33	1	1	0	730	0	260	1
375	74	0	2	111	43.915	66	132	36	0	1	1	730	0	730	0
376	83	1	4	128	80.5878	51.67	142	30	1	1	1	730	0	5	1
377	77	0	0	138	81.1412	68	143	13	0	0	0	730	0	730	0
378	53	0	3	124	87.5328	57	138	13	0	0	1	730	0	730	0
379	76	0	1	136	97.1964	60	140	18	0	1	1	730	0	707	1
380	88	1	11	135	33.6222	64	141	43	0	0	1	343	1	196	1
381	75	0	4	138	29.2999	63	132	52	0	0	1	38	1	38	0
382	77	1	5	104	53.5291	38	138	41	0	0	1	730	0	730	0
385	58	0	14	131	73.6716	31	147	19	0	0	0	730	0	13	1
386	81	0	13	108	43.1166	64	137	29	1	0	1	730	0	119	1
387	78	1	2	117	34.4557	52.67	138	29	1	0	1	309	1	265	1
389	66	0	4	95	62.6439	17.25	137	94	0	0	1	730	0	730	0
390	81	1	0	119	92.779	45.4	145	13	1	0	0	730	0	730	0
391	81	1	6	94	80.9878	60	138	32	1	1	0	730	0	469	1
393	87	1	4	147	79.8215	45	139	14	1	0	0	730	0	161	1
394	77	1	5	132	15.5242	41.57	139	48	1	1	1	492	1	196	1
396	88	1	0	112	52.0976	56	139	25	0	0	0	730	0	157	1
398	54	1	7	157	17.2051	56	139	81	0	1	1	730	0	19	1
399	74	0	2	125	43.915	44.25	139	17	1	0	1	571	1	571	0
400	63	0	0	148	45.3733	46.5	141	33	1	1	1	730	0	223	1
402	76	0	4	119	36.5599	74	141	57	1	1	0	730	0	379	1
404	80	1	2	161	45.03	35	139	37	1	1	1	730	0	21	1
406	56	1	9	82	19.4891	55	140	59	0	0	1	730	0	27	1
407	82	1	1	110	38.7789	57	142	30	1	0	1	730	0	147	1
409	51	0	6	99	58.4528	16	141	13	0	0	0	730	0	730	0
410	73	1	12	129	45.8748	51.75	141	33	1	1	1	400	1	42	1
411	68	1	6	124	83.9156	16.3333	140	12	0	0	1	730	0	730	0
412	90	1	3	143	79.274	51.6	136	16	0	0	0	730	0	730	0
413	76	1	4	155	58.8651	48.5	141	26	1	1	1	730	0	354	1
417	45	0	10	172	34.8566	26	136	55	0	1	1	730	0	93	1
419	87	1	3	171	31.7634	40	142	40	1	0	1	730	0	730	0
420	73	1	1	96	54.1119	62	135	36	0	1	1	730	0	111	1
421	87	0	0	114	94.5656	29.6	144	40	0	0	1	730	0	730	0
422	67	1	1	151	60.3907	51.5	140	21	1	1	0	730	0	730	0
423	56	1	2	162	87.2891	25	138	16	0	0	0	730	0	730	0
424	43	0	6	109.5	68.3364	18.4	135	22	0	0	1	730	0	144	1
425	71	1	6	118	95.2943	47	137	25	0	1	0	730	0	7	1
426	72	1	5	122	28.0909	55	136	26	1	1	1	730	0	531	1
427	63	0	4	154	32.5553	52.5	140	40	1	1	1	730	0	25	1
428	80	1	2	120	71.897	55	139	27	1	0	1	730	0	300	1
429	67	0	5	144	62.4529	49.5	138	15	1	1	0	730	0	730	0
431	75	1	3	152	42.3493	64.5	143	41	1	0	1	730	0	730	0
432	73	0	0	144	44.0364	61	142	28	0	0	1	254	1	217	1
434	98	1	0	101	55.9041	50.5	140	19	0	0	1	683	1	683	0
435	78	0	0	142	80.9289	66	135	29	0	0	1	730	0	365	1
436	75	0	5	129	31.4232	69.5	139	47	0	0	1	730	0	34	1
437	60	1	0	127	61.7587	30.4	135	23	0	1	1	730	0	10	1
438	65	1	8	102	67.1815	57	134	22	1	1	0	730	0	704	1
439	66	1	5	124	84.4257	65	140	21	0	0	0	730	0	72	1
440	74	0	0	119	48.5535	61	136	18	0	0	1	395	1	333	1
443	90	1	0	96	105.946	47	135	16	1	0	1	730	0	53	1
444	57	1	17	154	99.6391	64.5	142	12	0	1	0	730	0	88	1
445	60	0	6	112	73.1664	62.6	144	15	1	1	0	730	0	422	1
446	75	1	0	129	65.258	52	142	23	0	0	1	730	0	730	0
448	83	0	3	143	52.9504	67	138	15	1	0	0	730	0	63	1
449	83	1	0	145	80.5878	55.5	140	16	0	1	1	730	0	264	1
450	48	0	4	111	26.5926	55	139	32	1	0	0	730	0	730	0
451	57	1	10	106	116.239	58	142	13	0	1	0	730	0	31	1
452	61	1	6	113	44.1633	35	141	17	1	0	1	730	0	169	1
453	75	1	7	73	59.0236	48	137	18	1	1	1	730	0	334	1
454	90	0	1	179	52.0872	67.67	137	17	0	0	0	730	0	67	1
455	84	0	2	96	52.8218	42.5	143	21	0	0	1	730	0	730	0
456	79	1	8	148	32.3915	41.3333	136	46	0	1	1	730	0	223	1
457	80	1	3	87	53.1154	45.8	140	21	1	1	0	730	0	316	1
458	65	1	2	113	67.1815	34	140	24	0	0	0	730	0	292	1
459	91	0	13	92	58.6895	60	140	21	0	1	0	298	1	261	1
460	62	1	5	83	61.349	15.4	137	22	0	0	1	730	0	730	0
462	30	1	3	89	132.416	48.5	136	19	0	0	1	730	0	730	0
463	87	1	3	111	47.9384	17.67	137	48	0	0	1	730	0	730	0
464	63	0	1	118	50.1659	60.25	139	16	0	0	0	302	1	302	0
466	60	1	13	116	13.4359	34	139	48	1	1	1	374	1	57	1
468	59	1	3	116	24.3087	17	139	104	1	1	1	345	1	16	1
469	72	0	0	145	19.8445	44.8	136	51	1	1	1	730	0	121	1
470	88	1	0	119	47.8273	52.5	143	45	0	0	1	730	0	244	1
472	70	1	1	100	31.3792	16	136	31	1	0	1	730	0	171	1
476	48	1	10	167	30.5009	56	139	39	0	1	1	730	0	121	1
477	52	1	7	133	33.331	22	141	63	1	1	0	730	0	3	1
478	71	0	5	114	44.2855	30	140	43	1	1	0	730	0	6	1
479	70	1	8	106	59.856	70	140	16	0	0	1	730	0	34	1
480	71	1	4	118	73.6602	27.83	143	21	0	0	1	730	0	730	0
482	64	1	6	130	55.5767	47	140	15	0	0	1	730	0	9	1
483	77	1	5	176	10.349	51.5	140	42	0	0	1	730	0	29	1
484	65	0	3	105	37.7389	70	145	21	1	0	1	730	0	730	0
485	87	1	7	159	31.7634	34.5	140	61	1	0	1	730	0	291	1
487	83	0	0	113	15.4975	40.5	133	32	1	1	1	132	1	1	1
488	75	1	0	139	49.4048	38.3333	140	36	0	1	0	730	0	104	1
489	54	1	0	113	77.8686	21	138	21	0	0	0	730	0	730	0
490	81	0	7	82	53.2132	62	128	29	1	1	1	581	1	11	1
491	60	1	5	139	74.728	65.5	134	30	0	1	0	730	0	1	1
492	86	1	20	148	19.2001	30	141	55	1	1	0	526	1	80	1
493	66	1	0	117	166.364	74.5	135	14	0	1	0	730	0	730	0
494	68	1	1	153	60.2093	65	142	23	1	1	0	730	0	85	1
495	83	0	4	98	79.9146	30.33	136	22	0	1	1	730	0	163	1
496	71	1	4	82	46.1342	40	139	24	1	1	1	730	0	54	1
498	81	1	4	119	80.9878	55	138	27	0	0	1	730	0	173	1
499	62	1	4	120	67.829	35.5	140	30	1	1	0	730	0	101	1
500	85	0	0	102	79.5292	27	134	27	1	1	1	730	0	576	1
501	81	1	21	113	64.2463	16	140	51	1	1	1	479	1	22	1
502	57	1	0	113	77.0186	20	138	21	0	0	0	730	0	730	0
504	55	1	0	137	62.8593	70.5	140	19	0	1	1	730	0	730	0
505	53	1	18	122	78.1646	40.5	148	28	0	1	1	730	0	387	1
506	92	1	19	122	40.6289	16.2	147	38	1	1	1	221	1	6	1
507	86	0	1	97	21.1633	35	143	46	0	0	1	730	0	239	1
508	51	1	0	121	19.8626	36.17	137	55	1	1	1	196	1	196	0
510	64	1	1	99	27.3917	47	139	63	0	0	1	730	0	225	1
511	82	1	9	127	71.5375	50.5	141	32	0	0	1	730	0	189	1
512	44	1	0	162	91.6687	31	139	24	0	0	1	730	0	730	0
514	94	0	3	118	27.9872	50.6667	135	43	0	1	0	142	1	70	1
517	51	1	8	142	101.914	12	142	29	0	0	1	730	0	355	1
518	84	1	1	115	48.2811	35.4	143	33	1	1	1	730	0	432	1
519	88	0	10	130	59.0903	65	140	22	0	0	0	730	0	304	1
522	55	1	13	121	15.6663	72	136	62	0	0	0	730	0	13	1
523	44	0	8	100	60.2311	28	142	28	0	1	0	730	0	379	1
524	66	1	6	116	55.2306	20	143	27	1	0	1	730	0	158	1
525	83	1	10	145	92.3208	30	137	12	1	0	1	730	0	493	1
526	84	0	0	145	47.3201	64	140	26	0	0	1	730	0	89	1
527	70	0	3	131	70.9122	46.5	144	17	1	0	0	730	0	730	0
528	51	1	7	106	39.9776	36	138	24	0	0	1	597	1	357	1
530	86	0	8	126	68.01	52	140	22	1	0	1	730	0	284	1
531	64	1	0	108	47.1166	28.33	140	33	1	0	1	730	0	730	0
532	92	1	6	80	40.6289	29	137	38	1	0	1	283	1	264	1
533	65	1	6	150	67.1815	60	137	18	1	1	1	730	0	98	1
534	44	1	4	64	72.7194	45.5	136	28	0	1	1	730	0	87	1
535	43	1	2	86	66.0798	11.6	141	25	0	0	0	730	0	730	0
536	87	1	15	132	47.9384	61	138	20	0	0	1	730	0	378	1
537	81	0	9	136	43.1166	43.5	138	37	0	1	1	37	1	37	0
539	66	0	8	126	49.6944	68.4	136	11	1	0	1	137	1	116	1
540	75	0	8	144	5.53915	52.5	138	36	1	0	1	730	0	94	1
541	72	1	5	112	20.6729	22.2	147	80	1	1	1	730	0	22	1
548	47	1	11	107	71.7522	22.2	138	13	0	0	1	730	0	229	1
549	21	0	9	116	90.5452	50	141	13	0	0	1	730	0	730	0
552	61	0	18	113	125.432	65.5	135	10	1	0	0	730	0	322	1
554	55	1	2	122	69.4988	50	142	20	0	1	0	730	0	730	0
555	77	0	0	138	27.2835	63	137	49	0	1	0	730	0	105	1
556	65	1	3	115	55.4021	25.6667	139	28	1	0	1	730	0	10	1
557	60	1	6	130	98.6069	59.5	140	21	0	0	0	730	0	730	0
558	59	1	9	130	29.2497	37.5	139	45	0	1	1	730	0	10	1
561	50	1	8	99	64.0873	38.3333	140	16	1	1	0	730	0	59	1
562	45	1	6	117	104.537	17	133	19	0	1	0	730	0	18	1
563	54	1	1	93	77.8686	15	143	15	0	0	1	730	0	730	0
565	89	1	1	120	70.3577	46.5	134	28	0	0	1	730	0	663	1
566	38	1	9	214	7.58885	32.3333	143	28	0	0	1	730	0	42	1
567	44	1	18	116	127.068	52.5	142	12	0	0	0	730	0	730	0
568	85	1	6	132	20.7854	29	139	70	1	0	1	567	1	505	1
569	60	1	3	128	47.738	38.5	140	48	0	1	1	730	0	724	1
572	64	1	3	139	67.3932	21	140	24	0	1	1	730	0	90	1
575	83	1	5	126	71.3617	58	136	17	0	0	1	730	0	105	1
576	74	0	9	158	61.2057	55	138	36	1	1	1	730	0	730	0
577	61	0	18	113	85.0701	65	138	6	0	1	0	730	0	12	1
578	81	0	1	144	27.0044	62	142	53	0	0	1	730	0	730	0
579	82	1	5	80	52.8498	34	139	36	1	0	0	730	0	358	1
580	78	0	2	140	25.5661	52.5	138	28	1	0	1	636	1	322	1
581	53	0	2	125	65.4965	38	139	19	0	0	1	730	0	355	1
583	58	0	2	103	73.6716	31.5	139	25	0	1	1	730	0	114	1
584	43	1	1	164	17.4732	26	143	17	0	0	1	730	0	730	0
585	86	0	5	128	68.01	63	133	19	1	0	1	730	0	69	1
586	71	0	12	80	53.5854	63	141	36	0	1	1	654	1	654	0
588	84	0	0	122	59.651	58.25	143	41	0	0	0	730	0	730	0
589	62	0	1	133	72.681	69	137	14	0	1	1	730	0	730	0
591	46	1	7	103	72.0661	33.6	126	14	0	0	1	730	0	63	1
592	58	1	7	102	76.7471	38	141	23	0	1	0	730	0	77	1
593	69	1	12	134	74.0887	22.4	134	21	1	1	0	730	0	638	1
595	84	0	3	127	47.3201	74	142	17	0	0	1	730	0	85	1
596	81	0	5	148	95.9473	63	133	20	0	1	0	730	0	730	0
598	71	1	4	99	83.1834	60	133	21	1	1	0	730	0	5	1
599	68	1	11	102	46.5403	15	136	32	1	0	1	730	0	70	1
600	77	1	3	98	93.7378	49.5	138	10	1	0	1	730	0	730	0
601	45	0	2	82	53.7122	68	136	26	0	0	1	730	0	217	1
602	50	1	3	143	79.0947	49.5	137	27	1	1	1	730	0	156	1
604	73	1	11	155	29.4868	58	139	42	0	0	1	730	0	730	0
606	63	1	17	135	113.901	27.4	130	17	0	1	1	338	1	338	0
609	48	1	4	172	58.919	16.83	140	34	0	0	1	730	0	730	0
612	54	0	25	134	40.644	55	141	77	0	1	1	694	1	9	1
